# Supplementary material for: miR-942 promotes cancer stem cell-like traits in esophageal squamous cell carcinoma through activation of Wnt/β-catenin signalling pathway
Source: PubMed Central journal article supplement (PMC4484432; doi:10.18632/oncotarget.3696), 2015-03-30
Supplement: oncotarget-06-10964-s001.pdf [file oncotarget-06-10964-s001.pdf]

# miR-942 promotes cancer stem cell-like traits in esophageal squamous cell carcinoma through activation of Wnt/ $\beta$ -catenin signalling pathway

Supplementary Material

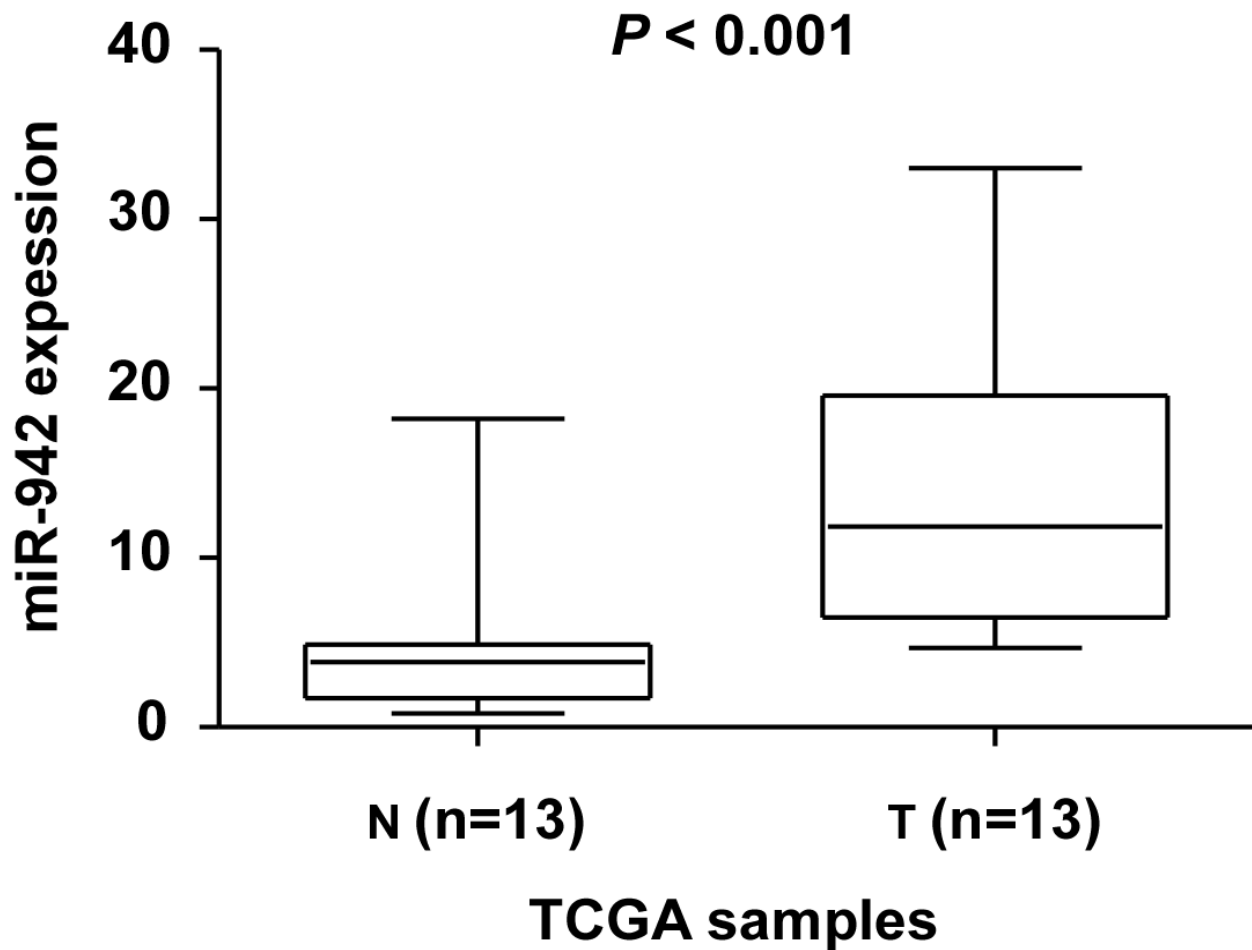

Supplementary Figure 1. Expression profiling of miR-942 from the Cancer Genome Atlas (TCGA) datasets in paired primary esophageal tumors (T) and the adjacent normal tissues (ANT) (n = 13;  $P < 0.001$ ).

**A**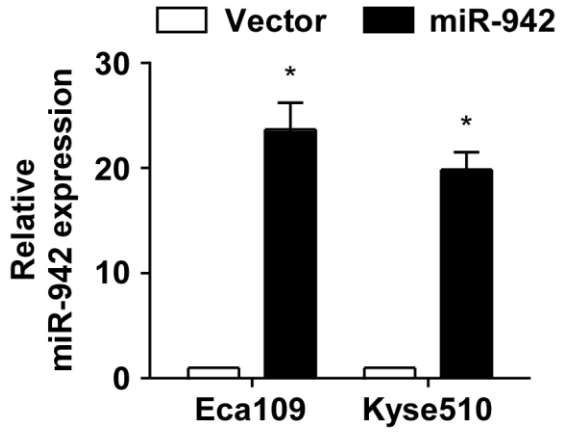**B**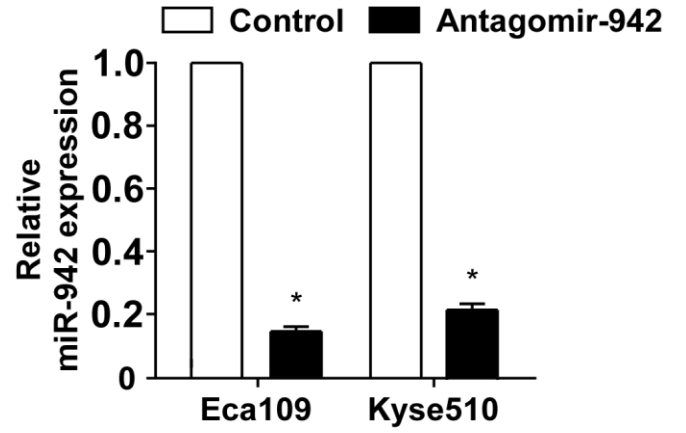

**Supplementary Figure 2. Relative miR-942 expression in miR-942-overexpressing (A) or miR-942-silenced cells (B).** Each bar represents the mean  $\pm$  SD of three independent experiments. \* $P < 0.05$ .

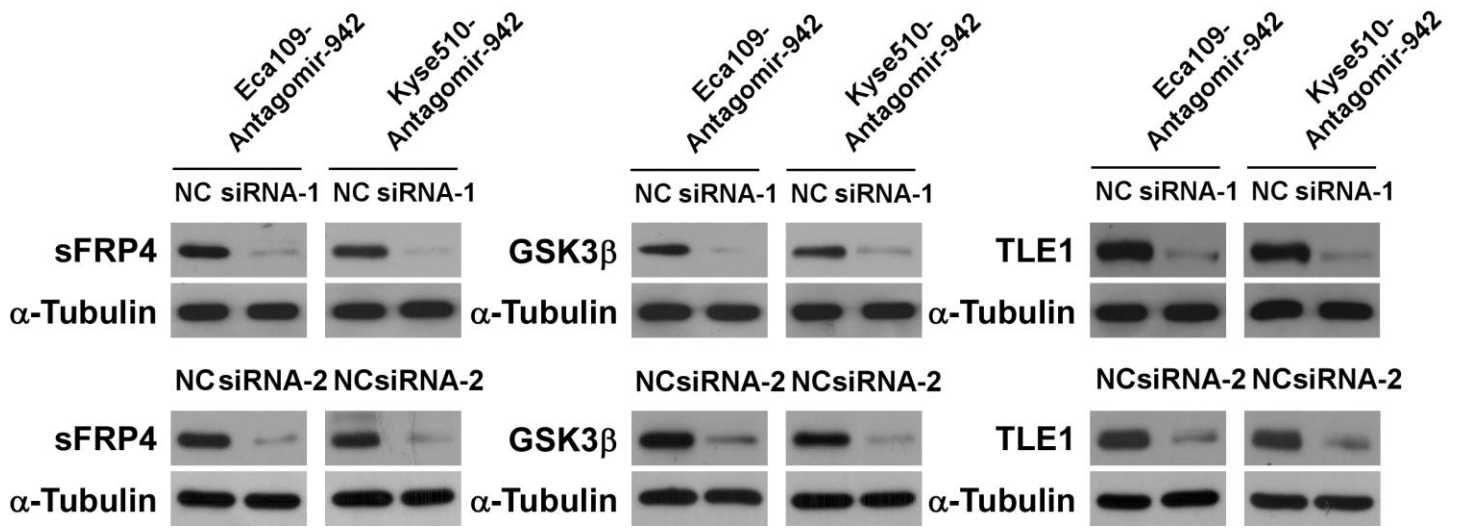

Supplementary Figure 3. Western blot analysis of the expression levels of sFRP4, GSK3β, and CtBP2 expression in antagomir-942 cells which transfected with sFRP4-siRNA (left panel), GSK3β-siRNA (middle panel), or CtBP2-siRNA (right panel). α-Tubulin served as the loading control.

**Supplementary Table 1.** Clinicopathological characteristics and expression of miR-942 in studied ESCC patients

| <b>Factor</b>                       | <b>No.</b> | <b>(%)</b> |
|-------------------------------------|------------|------------|
| <b>Gender</b>                       |            |            |
| Male                                | 116        | 73.4       |
| Female                              | 42         | 26.6       |
| <b>Age (years)</b>                  |            |            |
| ≤57                                 | 89         | 56.3       |
| >57                                 | 69         | 43.7       |
| <b>Clinical stage</b>               |            |            |
| I                                   | 20         | 12.7       |
| II                                  | 69         | 43.7       |
| III                                 | 53         | 33.5       |
| IV                                  | 16         | 10.1       |
| <b>T classification</b>             |            |            |
| T <sub>1</sub>                      | 18         | 11.3       |
| T <sub>2</sub>                      | 49         | 31.0       |
| T <sub>3</sub>                      | 83         | 52.5       |
| T <sub>4</sub>                      | 8          | 5.0        |
| <b>N classification</b>             |            |            |
| N <sub>0</sub>                      | 86         | 54.4       |
| N <sub>1</sub>                      | 72         | 45.6       |
| <b>M classification</b>             |            |            |
| No                                  | 144        | 91.1       |
| Yes                                 | 14         | 8.9        |
| <b>Histological differentiation</b> |            |            |
| Well                                | 47         | 29.7       |
| Moderate                            | 66         | 42.0       |
| Poor                                | 45         | 28.3       |
| <b>Vital status</b>                 |            |            |
| Alive                               | 54         | 34.2       |

|                              |     |      |
|------------------------------|-----|------|
| Dead                         | 104 | 65.8 |
| <hr/>                        |     |      |
| <b>Expression of miR-942</b> |     |      |
| Low expression               | 79  | 50.0 |
| High expression              | 79  | 50.0 |
| <hr/>                        |     |      |

**Supplementary Table 2.** Correlation between the clinicopathological features and expression of miR-942

| Patient characteristics      |                | miR-942 expression |      | P-value |
|------------------------------|----------------|--------------------|------|---------|
|                              |                | Low                | High |         |
| Gender                       | Male           | 57                 | 59   | 0.552   |
|                              | Female         | 22                 | 20   |         |
| Age (years)                  | ≤57            | 49                 | 50   | 0.612   |
|                              | >57            | 30                 | 29   |         |
| Clinical stage               | I              | 14                 | 6    | < 0.001 |
|                              | II             | 30                 | 39   |         |
|                              | III            | 16                 | 37   |         |
|                              | IV             | 5                  | 11   |         |
| T classification             | T <sub>1</sub> | 10                 | 8    | 0.005   |
|                              | T <sub>2</sub> | 22                 | 27   |         |
|                              | T <sub>3</sub> | 34                 | 49   |         |
|                              | T <sub>4</sub> | 3                  | 5    |         |
| N classification             | N <sub>0</sub> | 51                 | 35   | < 0.001 |
|                              | N <sub>1</sub> | 23                 | 49   |         |
| M classification             | No             | 70                 | 74   | 0.004   |
|                              | Yes            | 4                  | 10   |         |
| Histological differentiation | Well           | 27                 | 20   | 0.045   |
|                              | Moderate       | 24                 | 42   |         |
|                              | Poor           | 16                 | 29   |         |
| Vital status                 | Alive          | 30                 | 24   | < 0.001 |
|                              | Dead           | 35                 | 69   |         |

**Supplementary Table 3.** Univariate and multivariate analysis of different prognostic parameters in patients with ESCC by Cox-regression analysis

|                           | Univariate analysis |                          | Multivariate analysis |                          |
|---------------------------|---------------------|--------------------------|-----------------------|--------------------------|
|                           | <i>P</i>            | Hazard ratio<br>(95% CI) | <i>P</i>              | Hazard ratio<br>(95% CI) |
| <b>Clinical stage</b>     |                     |                          |                       |                          |
| I                         | <0.001              | 1.985<br>(1.435-2.529)   | 0.312                 | 1.314<br>(0.953-2.043)   |
| II                        |                     |                          |                       |                          |
| III                       |                     |                          |                       |                          |
| IV                        |                     |                          |                       |                          |
| <b>miR-942 expression</b> |                     |                          |                       |                          |
| Low expression            | <0.001              | 2.931<br>(2.223-4.012)   | <0.001                | 2.352<br>(1.820-3.380)   |
| High expression           |                     |                          |                       |                          |
